# Supplementary material for: Discovering Transcription and Splicing Networks in Myelodysplastic Syndromes
Source: PubMed Central journal article supplement (PMC3828332; doi:10.1371/journal.pone.0079118), 2013-11-14
Supplement: pone.0079118.s001.pdf [file pone.0079118.s001.pdf]

## **Quantitative RT-PCR**

RNA were prepared with were directly lysed in Nugen lysis buffer (Nugen, San Carlos, CA), then transcribed into cDNA with the WT-Ovation RNA Amplification System (NuGEN) and analyzed according with user's guide. Quantitative RT-PCR analysis of the gene expression was then performed using RT2-SYBR®Green PCR Master Mix (SABioscience, Qiagen) with 40 cycles of 15 seconds at 95°C and 1 minute at 58 °C on an ABI 7500 Real-Time PCR System (Applied Biosystems, Foster City, CA). Fluorescence data were collected at 58 °C after each cycle. After the final cycle, melting curve analysis of all samples was conducted within the range of 58 °C -95 °C. The specificity of the PCR products of each PCR reaction was verified by the targeted product size by gel electrophoresis. The threshold cycle and 2- $\Delta\Delta t$  method were used for calculating the relative amount of the target RNA using the average of 5 house-keeping genes as internal control, according to user's manual. The experiments were repeated in triplicate.
